1 **Stabilizing role of seed banks and the maintenance of bacterial diversity**

2

3 Nathan I. Wisnoski ([wisnoski@indiana.edu](mailto:wisnoski@indiana.edu)) and Jay T. Lennon ([lennonj@indiana.edu](mailto:lennonj@indiana.edu))

4 Department of Biology, Indiana University, Bloomington, Indiana, USA 47405

5

6 **Statement of authorship:** JTL designed the study and coordinated data collection. NIW

7 performed statistical analyses and wrote the first draft of the manuscript. Both authors

8 contributed substantially to edits and revisions.

9

10 **Data accessibility statement:** Sequence data are available on NCBI SRA (BioProject

11 PRJNA664410), remaining data and code to reproduce all analyses will be available on Zenodo.

12

13 **Running head:** Stabilization of freshwater bacterioplankton

14 **Keywords:** bacterioplankton, community dynamics, dormancy, negative frequency dependence,

15 seasonality

16

17 **Type of Article:** Letter

18 **Abstract:** 150 words; **Main text:** 5063 words

19 **References:** 83

20 **Figures:** 5; **Tables:** 1; **Text boxes:** 0

21 **Correspondence:** Jay T. Lennon, 1001 E. Third St., Bloomington, IN, 47405. Tel: (812) 856-

22 7235. Email: [lennonj@indiana.edu](mailto:lennonj@indiana.edu).

23

24  
25  
26  
27  
28  
29  
30  
31  
32  
33  
34  
35  
36  
37  
38

## ABSTRACT

Coexisting species often exhibit negative frequency dependence due to mechanisms that promote population growth and persistence when rare. These stabilizing mechanisms can maintain diversity through interspecific niche differences, but also through life-history strategies like dormancy that buffer populations in fluctuating environments. However, there are few tests demonstrating how seed banks contribute to long-term community dynamics and the maintenance of diversity. Using a multi-year, high-frequency time series of bacterial community data from a north temperate lake, we documented patterns consistent with stabilizing coexistence. Bacterial taxa exhibited differential responses to seasonal environmental conditions, while seed bank dynamics helped maintain diversity over winter. Strong negative frequency dependence in rare, but metabolically active, taxa suggested a role for biotic interactions in promoting coexistence. Together, our results provide field-based evidence that niche differences and seed banks contribute to recurring community dynamics and the long-term maintenance of diversity in nature.

39

## INTRODUCTION

40           The maintenance of biodiversity is important for regulating species interactions,  
41 stabilizing ecosystem functions, and promoting resilience in response to perturbations. Diversity  
42 is maintained by many processes, including niche differentiation in resource use (Tilman 1982;  
43 Gudelj *et al.* 2010; Johnson *et al.* 2012), defensive abilities (Leibold 1996; Thingstad *et al.* 2014;  
44 Cadier *et al.* 2019), and abiotic constraints (Holt 2009). These stabilizing niche differences  
45 among species contribute to the maintenance of diversity by causing species to limit their own  
46 growth more than the growth of other species, thereby preventing competitive exclusion and  
47 allowing populations to recover from low abundances (Chesson 2000; Chase & Leibold 2003;  
48 Adler *et al.* 2007). Some stabilizing mechanisms of coexistence rely on environmental  
49 fluctuations and can further increase the number of species in a community (Chesson 1994;  
50 Chesson & Huntly 1997; Descamps-Julien & Gonzalez 2005). For example, in seasonal  
51 environments, species that are favored at different times of the year may be able to coexist in the  
52 community if they can survive through periods of unfavorable environmental conditions (Pake &  
53 Venable 1996). Given the near ubiquity of environmental variability, a central and unresolved  
54 question is how stabilizing mechanisms promote the maintenance of diversity across the wide  
55 range of taxonomic groups and ecosystems that exist in nature.

56           Stabilization from niche differences should generate negative frequency-dependence  
57 (NFD) in population growth. The implication of NFD is that rare populations grow faster than  
58 common populations (Chesson 2000; Adler *et al.* 2007). NFD may arise from mechanisms that  
59 promote coexistence in relatively constant environments, such as trade-offs in resource  
60 acquisition and allocation, but also in temporally variable environments. In fluctuating  
61 environments, the storage effect is a coexistence mechanism that reflects the ability of species to

62 grow well during favorable conditions while minimizing losses during unfavorable conditions by  
63 “storing” individuals in long-lived life stages (Warner & Chesson 1985; Chesson 2000). The  
64 storage effect requires that taxa differ in their responses to environmental conditions, that  
65 intraspecific limitation peaks during favorable conditions, and that population growth is buffered  
66 in suboptimal environments (Pake & Venable 1996; Cáceres 1997; Angert *et al.* 2009). The  
67 storage effect may be particularly important in communities where species experience periods of  
68 extremely slow growth (Gray *et al.* 2019) or engage in various forms of dormancy, which are  
69 common among plants and animals, but also microorganisms (Lennon & Jones 2011).

70 Support for stabilizing coexistence has largely come from plant and animal communities  
71 (Cáceres 1997; Angert *et al.* 2009; Yenni *et al.* 2017), while evidence for its role in complex  
72 microbial systems is less common (Zhang *et al.* 2010). In microbial communities, which contain  
73 a disproportionately large number of rare taxa (Sogin *et al.* 2006; Lynch & Neufeld 2015; Shade  
74 *et al.* 2018), populations may vary widely in their stability and long-term contributions to  
75 diversity. Although rare taxa are prone to extinction (Lande 1993), some persist for longer  
76 periods of time (Alonso-Sáez *et al.* 2015; Lynch & Neufeld 2015; Newton & Shade 2016). In  
77 fluctuating environments, many of these rare taxa can quickly respond to favorable conditions  
78 (Shade *et al.* 2014; Linz *et al.* 2017; Nyirabuhoro *et al.* 2020), suggesting that temporally  
79 variable opportunities for growth may be important for population persistence. While niche  
80 differences among bacterial taxa are well documented (Lennon *et al.* 2012; Evans *et al.* 2014;  
81 Meier *et al.* 2017), the long-term implications of these differences and their contribution to the  
82 maintenance of biodiversity in nature remain understudied.

83 A leading hypothesis for the long-term maintenance of microbial diversity has been  
84 coexistence mediated by dormant seed banks (Jones & Lennon 2010; Lennon & Jones 2011;

85 Mestre & Höfer 2020; Sorensen & Shade 2020). Dormancy can buffer microbial populations in  
86 different ways (Rittershaus *et al.* 2013). For example, some species form physical resting  
87 structures that protect individuals from harsh abiotic stress (Setlow 2006; de Rezende *et al.*  
88 2013). Other species may reduce mortality associated with resource limitations by shifting  
89 energetic demands from growth to maintenance energy levels (Lennon & Jones 2011; Hoehler &  
90 Jørgensen 2013; Lever *et al.* 2015). Dormancy may even protect against top-down pressure from  
91 grazers (which may be unable to digest or extract energy from starved cells or endospores) and  
92 phage (which cannot replicate due to inactive host machinery) (Pernthaler 2005; Klobutcher *et*  
93 *al.* 2006; Bautista *et al.* 2015; Kearney *et al.* 2018). Consequently, dormant bacteria may exhibit  
94 reduced mortality in the environment (Hoehler & Jørgensen 2013), thereby accumulating into  
95 seed banks until favorable conditions return (Wörmer *et al.* 2019). Much insight has been gained  
96 from short-term microbial studies and analogies with plant and zooplankton communities, but  
97 evidence from long-term field studied demonstrating how the temporal dynamics of microbial  
98 seed banks help maintain diversity in fluctuating environments is lacking.

99         In this study, we tracked bacterioplankton dynamics over time in a north temperate lake  
100 using high-resolution molecular data to infer ecological processes that maintain microbial  
101 diversity. Bacterial communities in fluctuating aquatic environments often exhibit recurrent,  
102 seasonal community patterns (Shade *et al.* 2007; Gilbert *et al.* 2012; Fuhrman *et al.* 2015; Ward  
103 *et al.* 2017), but the potential mechanisms that contribute to cyclical dynamics and maintain  
104 diversity in nature are poorly resolved. We characterized how persistent (and putatively  
105 coexisting) taxa respond to environmental fluctuations and used null models to assess whether  
106 stabilizing biotic interactions (e.g., self-limitation, as evidenced by strong NFD) help maintain  
107 rare, but metabolically active, taxa in the community (Yenni *et al.* 2017; Rovere & Fox 2019).

108 Specifically, we compared patterns of NFD and population dynamics in the active and total  
109 portions of the community (inferred by 16S rRNA transcripts and genes, respectively) to  
110 quantify the importance of slow growth or dormancy strategies for the maintenance of diversity.  
111 Our results provide empirical evidence that stabilizing biotic interactions and seed bank  
112 dynamics underlie seasonal community dynamics and play key roles in maintaining bacterial  
113 diversity in natural ecosystems.

114

115

## METHODS

116 *Study site and sampling:* University Lake is a 3.2 ha meso-eutrophic reservoir located in  
117 the Indiana University Research and Teaching Preserve, Bloomington, Indiana, USA (39°11' N,  
118 86°30' W). The surrounding watershed is dominated by oak, beech, and maple forests. Three  
119 streams drain into University Lake, which has an estimated volume of 150,000 m<sup>3</sup> and a  
120 maximum depth of 10 m. From April 2013 to September 2015, we took weekly water samples (1  
121 L) from the epilimnion using a 1 m depth-integrated sampler for microbial biomass, and  
122 measured environmental variables commonly associated with aquatic microbial community  
123 dynamics: total phosphorus (TP), total nitrogen (TN), and dissolved organic carbon (DOC).  
124 Microbial biomass was filtered on 0.2 µm Supor filters (Pall, Port Washington, NY, USA) and  
125 frozen at -80 °C. We quantified TP using the ammonium molybdate method (Wetzel & Likens  
126 2000) and TN with the second derivative method after persulfate digestion (Crumpton *et al.*  
127 1992). DOC was quantified on 0.7 µm filtrates using nondispersive infrared (NDIR) detection on  
128 a Shimadzu TOC-V (Kyoto, Japan). We also quantified water transparency with a Secchi disk  
129 and used a Quanta Hydrolab (OTT, Kempton, Germany) water sonde to measure temperature,  
130 conductivity, dissolved oxygen, salinity, and pH of the samples.

131  
132 *Bacterial community structure:* We characterized the structure of the bacterial  
133 community using high-throughput 16S rRNA sequencing. We extracted total nucleic acids from  
134 biomass retained on 0.2  $\mu\text{m}$  filters using the MoBio PowerWater RNA extraction kit and the  
135 DNA elution accessory kit. Because sequences obtained from DNA can come from  
136 metabolically active or inactive (e.g., slow growing or dormant) individuals, this sample  
137 represents the “total” community. In contrast, RNA is a more ephemeral molecule that is  
138 essential for synthesizing proteins; therefore, it is often used to characterize the metabolically  
139 “active” subset of the community (Molin & Givskov 1999; Steiner *et al.* 2019; Locey *et al.*  
140 2020). After extracting nucleic acids, we used DNase (Invitrogen) to remove DNA from the  
141 RNA extractions and then synthesized cDNA with SuperScript III First Strand Synthesis kit and  
142 random hexamer primers (Invitrogen). To amplify the 16S rRNA gene (DNA) and transcripts  
143 (cDNA), we used barcoded V4 primers (515F and 806R) designed for the Illumina MiSeq  
144 platform (Caporaso *et al.* 2012). We then purified the PCR products with AMPure XP,  
145 quantified DNA concentrations using PicoGreen, and pooled samples at 10 ng per sample. The  
146 resulting libraries were sequenced on an Illumina MiSeq at the Indiana University Center for  
147 Genomic and Bioinformatics Sequencing Facility using 250  $\times$  250 bp paired-end reads (Reagent  
148 Kit v2). Sequences were subsequently processed using the software package mothur (version  
149 1.41.1) (Schloss *et al.* 2009). We assembled contigs, removed low quality sequences (minimum  
150 score of 35), aligned sequences to the SILVA Database (version 132) (Quast *et al.* 2013),  
151 removed chimeras using the VSEARCH algorithm (Rognes *et al.* 2016), and created 97% similar  
152 operational taxonomic units (OTUs) using the OptiClust algorithm (Westcott & Schloss 2017),  
153 and classified sequences with the RDP taxonomy (Cole *et al.* 2009). To account for variation in

154 sequencing depth, subsequent analyses were performed on rarefied abundance data subsampled  
155 to the fewest number of reads in the time series ( $N = 5979$  per sample) using R (version 3.6.0) (R  
156 Core Team 2020).

157

158 *Differential responses to environment:* We evaluated whether niche partitioning occurred  
159 along a suite of environmental variables. First, we performed a principal component analysis  
160 (PCA) on Hellinger-transformed abundances to visualize seasonal patterns of compositional  
161 trajectories. Next, we identified environmental drivers of community dynamics using redundancy  
162 analysis (RDA). We then looked more closely at the persistent, and potentially coexisting, subset  
163 of taxa in the community (OTUs present in  $\geq 80\%$  of the DNA-based samples, Table S1). To  
164 determine whether environmental fluctuations facilitated temporal niche partitioning, we  
165 identified the week of the year when each persistent OTU ( $n = 82$ ) experienced its maximum  
166 average growth rate (see calculations in *Stabilizing niche differences* below). For each of the  
167 persistent OTUs, we compared the environmental conditions at the time of the year when they  
168 experienced maximum growth (as an index of optimal conditions along an annual environmental  
169 cycle). Specifically, we performed a principal component analysis (PCA) on the environmental  
170 variables including temperature, specific conductivity, transparency, pH, TP, TN, and DOC (all  
171 standardized to mean = 0, standard deviation = 1). We plotted each time point along the first two  
172 PC axes, along with the PC loadings of the environmental variables, and labeled each point with  
173 the name of the OTU that exhibited maximum growth at that particular time point (Fig. S1).

174

175 *Stabilizing niche differences:* We then inferred whether niche differences contributed to  
176 patterns of negative frequency dependence (NFD) in the community. In particular, we examined



177 (1) whether growth exhibited negative frequency dependence overall, which is indicative of  
178 stabilization in the community, and (2) whether rare taxa experienced stronger negative  
179 frequency dependence than common taxa (Yenni *et al.* 2012, 2017; Rovere & Fox 2019). Such  
180 patterns of NFD shed light on coexistence for three reasons. First, taxa are more likely to be  
181 common in the community when they are environmentally favored relative to other taxa in the  
182 community. Second, taxa that experience strong intraspecific limitation during environmentally  
183 favorable periods should grow faster when rare than when common, thereby generating NFD.  
184 Third, differences among taxa in the strength of self-limitation during favored growth periods  
185 should lead to different average relative abundances in the community, implying that rare yet  
186 persistent taxa may be strongly stabilized (Yenni *et al.* 2012, 2017; Rovere & Fox 2019).  
187 Patterns of NFD often arise from density-dependent processes, such as nutrient limitation, but  
188 density dependence will only generate NFD if species limit their own growth more strongly than  
189 they limit the growth of other species (Adler *et al.* 2007). However, metabolically inactive  
190 individuals are unlikely to engage in the biotic interactions that generate NFD. Therefore, we  
191 focused on NFD in the metabolically active (i.e., RNA-based) portion of the community  
192 comprised of the persistent taxa (Table S1).

193 We then calculated NFD for each OTU by comparing rates of change in relative  
194 abundance between weekly samples. We inferred the strength of NFD for a given OTU as the  
195 magnitude of the negative slope of the relationship between an OTU's relative abundance and its  
196 per capita growth rate at each time step ( $t$ ) across the time series. We calculated the relative  
197 abundance ( $x_{t,s}$ ), of each OTU ( $s$ ) as its abundance ( $N_{t,s}$ ) in the community of  $s$  OTUs relative  
198 to the total abundance of all  $s$  OTUs ( $\sum_s N_{t,s}$ ) at a given time step ( $t$ ), such that  $x_{t,s} = \frac{N_{t,s}}{\sum_s N_{t,s}}$ .  
199 From this, we then calculated the natural log of the per capita growth rate of each OTU as  $y_{t,s} =$

200  $\log_e \left( \frac{N_{t+1,s}}{N_{t,s}} \right)$ . To estimate the strength of NFD for each OTU, we fit simple linear regressions  
201  $(y_s = \beta_{0,s} + \beta_{1,s}x_s + \epsilon_s)$ , where the equilibrium frequency of an OTU ( $f$ ) is the x-intercept,  $f =$   
202  $-\frac{\beta_{0,s}}{\beta_{1,s}}$ , and the degree of NFD is the slope,  $\text{NFD} = \beta_{1,s}$ . In the end,  $f$  describes whether an OTU  
203 is common or rare, and negative slopes with greater magnitudes indicate stronger negative  
204 frequency dependence.

205

206 *Stabilization of rare bacterial taxa:* We then inferred whether rare taxa exhibited stronger  
207 NFD than expected by chance. Stabilization of rare taxa would be supported if OTUs with lower  
208 equilibrium frequencies (smaller values of  $f$ ) had more negative slopes (larger  $|\beta_{1,s}|$ ) indicating  
209 stronger self-limitation. We inferred the overall relationship between rarity and strength of NFD  
210 from the covariance between the  $\log(\text{NFD})$  and  $\log(f)$ : a more negative covariance would  
211 indicate that rarer taxa were more strongly stabilized than common taxa. To account for the fact  
212 that the expectation of this covariance is already negative, and to control for spurious statistical  
213 correlations in the temporal data due to other factors, we implemented a null model approach  
214 (Yenni *et al.* 2017; Rovere & Fox 2019). We shuffled the abundances of each OTU  
215 independently, recalculated relative abundances and per capita growth rates, estimated  
216 equilibrium frequencies ( $f$ s) and negative frequency dependences (NFDs), and calculated the  
217 covariance, repeating this procedure 5000 times to generate a null distribution of covariance  
218 values ( $\text{COV}[\log(f), \log(\text{NFD})]$ ) (Yenni *et al.* 2017). This procedure maintains the potential  
219 abundances detected for each OTU but erases the temporal structure of each taxon's growth  
220 dynamics, removing signatures of intraspecific limitation as well as any interspecific limitations  
221 correlated with the population dynamics of other OTUs. We then compared our observed

222 covariance with the null distribution to infer the strength of asymmetry in NFD (i.e., the degree  
223 to which rare OTUs experience disproportionately stronger self-limitation than common OTUs).  
224 We quantified divergence from null distributions using standardized effect sizes (SES = mean  
225 observed covariance / standard deviation of covariances in the null distribution) and the ratio of  
226 observed covariance to the average covariance of the null distribution (Yenni *et al.* 2017). More  
227 negative SES values and larger ratios would indicate greater deviations from the null expectation  
228 of equal NFD across taxa. We inferred the degree of statistical significance by calculating a p-  
229 value as the proportion of null covariance values less than or equal to our observed covariance.

230

231 *Seed bank dynamics:* Given the hypothesis that seed banks are important for the  
232 maintenance of bacterial diversity in nature, we analyzed the temporal dynamics of buffered  
233 population growth, a key criterion of the storage effect. First, we examined whether the seed  
234 bank served as a reservoir of taxonomic diversity by comparing the ratio of total richness to  
235 active richness at each time point in the time series, where larger ratios indicate that the total  
236 community had higher  $\alpha$ -diversity than the active subset of the community. Second, we sought to  
237 determine whether seed bank dynamics were more important for the maintenance of rare or  
238 common taxa in the community. To do so, we developed a reactivation metric to quantify each  
239 OTU's frequency of reactivation from the seed bank. For each OTU, its reactivation score is the  
240 number of times an OTU was present (i.e., detected in the DNA pool) but likely in an inactive  
241 (i.e., absent from the RNA pool) state at time point  $t$ , yet active (present in the RNA pool) at the  
242 subsequent time point  $t+1$ . This represents a transition from the inactive to active state mediated  
243 by slow growth or dormancy based on recovery of sequences in the DNA and RNA pools. Thus,  
244 OTUs with higher reactivation scores may be more reliant on the seed bank for long-term

245 persistence in the community. We then analyzed the relationship between the average relative  
246 abundance of active OTUs (excluding zeroes) and their reactivation score to determine whether  
247 seed banking was more important for maintaining rare taxa than common taxa in the  
248 bacterioplankton community.

249 We compared observed patterns of reactivation to null models of community dynamics  
250 because the probability of resuscitation may not be independent of relative abundance. Such non-  
251 independence could be expected, for example, if rarer OTUs were more likely to be inactive than  
252 common OTUs. We generated null models of bacterial time series ( $n = 1000$ ) by randomly  
253 redistributing observed counts of each OTU across the time series, keeping total observed counts  
254 for each OTU constant to preserve the relationships among common and rare taxa in the  
255 community. By redistributing individuals across sampling dates for each taxon independently,  
256 we removed population dynamic signatures of intraspecific density dependence as well as  
257 interspecific density dependence arising from biotic interactions with other taxa in the  
258 community. Thus, our null models represent the range of reactivation scores possible for an OTU  
259 of a given mean relative abundance in the community if its dynamics were stochastic. We then  
260 compared our observed reactivation scores to the null models to identify whether common or  
261 rare OTUs reactivated more or less frequently than expected by chance.

262

263

## RESULTS

264 *Differential responses to environment:* Bacterial community dynamics were related to  
265 environmental variability, with different taxa favored at different times of the year. During the  
266 summer months, the community followed a recurrent successional trajectory (Fig. 1A). This  
267 trajectory was strongly aligned with seasonal trends in temperature (Fig. 1B). Across longer time

268 scales, inter-annual variation in dissolved oxygen and pH was associated with compositional  
269 differences in the active bacterial community during winter months. Within an annual cycle, the  
270 persistent OTUs ( $n = 82$ ) demonstrated temporal partitioning in their maximal growth rates in the  
271 active portion of the community (Fig. 2, Table S1), corresponding to different environmental  
272 conditions (Fig. S1).

273

274 *Stabilizing biotic interactions:* Persistent taxa exhibited stabilizing NFD, which varied in  
275 strength depending on each taxon's mean relative abundance in the community (Fig. S2). In  
276 particular, NFD was significantly stronger for rare taxa than common taxa, but only in the active  
277 portion of the community ( $p = 0.0002$ ;  $SES = -4.03$ , covariance ratio = 1.08), not in the total  
278 community ( $p = 0.221$ ;  $SES = -0.777$ , covariance ratio = 1.01) (Fig. 3). The p-values reflect the  
279 rank of observed NFD compared with null simulations, while SES values take into account the  
280 variance in the null distribution. In other words, the total community showed nearly the same  
281 degree of stabilization ( $|SES| < 2$ , covariance ratio  $\sim 1$ ) as the null communities.

282

283 *Seed bank dynamics:* Our data suggest seed banks of dormant or slow growing  
284 individuals contribute to the maintenance of diversity. Over the course of our study, total  
285 richness ranged from 1.2–2.0 times higher than the richness of the active portion of the  
286 community (Fig. 4). Furthermore, this discrepancy between total and active richness exhibited  
287 seasonality, demonstrating a time-varying role for the bacterial seed bank. In particular, the seed  
288 bank played a weaker role (i.e., active and total richness were more similar in magnitude) during  
289 the summer, while proportionally higher diversity was found in the seed bank over winter, when  
290 growing conditions may be less optimal (Fig. 4). In addition, the taxa that exhibited more

291 reactivations from the seed bank were also the taxa that were, on average, consistently rare when  
292 active in the community (Fig. 5). In contrast, common taxa exhibited fewer transitions between  
293 active and inactive states in the community. Compared to null models of community dynamics,  
294 the observed relationship between relative abundance and reactivation actually implies a far  
295 stronger role for the seed bank among taxa of low-to-intermediate abundance ranks than  
296 expected by chance alone (Fig. S3), suggesting that the seed bank may be an important source of  
297 reestablishment in the active community. Thus, our findings support the view that rare taxa in the  
298 community benefit from life-history strategies such as slow growth or dormancy that minimize  
299 the probability of local extinction.

300

301

## DISCUSSION

302 Our findings from a multi-year survey support the view that biodiversity was maintained  
303 by stabilizing mechanisms, including niche differentiation and seed bank dynamics, that  
304 generated negative frequency dependence (NFD) in a natural bacterioplankton community. High  
305 resolution sampling revealed recurrent seasonality in community dynamics (Fig. 1), driven by  
306 taxon-specific responses to annual environmental fluctuations (Fig. 2, Fig. S2). Our results also  
307 showed that the maintenance of diversity may be enhanced by life-history strategies, such as  
308 slow growth or dormancy, that buffered rare taxa from local extinction during environmentally  
309 unfavorable periods (e.g., winter) and facilitated reestablishment when conditions improved (Fig.  
310 4-5). These apparent niche differences and seed bank dynamics contributed to stabilizing biotic  
311 interactions (e.g., stronger intra- than interspecific limitation) among rare, but metabolically  
312 active, taxa in the community (Fig. 3).

313

314           *Negative frequency dependence in microbial communities:* We found evidence for  
315 stabilization through negative frequency dependence (NFD). While documented in some plant  
316 and animal assemblages (Harpole & Suding 2007; Yenni *et al.* 2017; Rovere & Fox 2019),  
317 observations of NFD in complex microbial communities are uncommon. In particular, our study  
318 revealed disproportionately strong NFD for rare taxa, offering an explanation for why some taxa  
319 appear to stably persist at low relative abundances in nature (Alonso-Sáez *et al.* 2015; Lindh *et*  
320 *al.* 2015), potentially as members of the “rare biosphere” (Sogin *et al.* 2006; Lynch & Neufeld  
321 2015; Shade *et al.* 2018). Our approach also allowed us to identify stabilizing mechanisms  
322 operating among metabolically active rare taxa that were not detectable from the dynamics of the  
323 total bacterial community (Fig. 3). Ignoring this metabolic heterogeneity can obscure inferences  
324 of underlying ecological processes (Wisnoski *et al.* 2020), and would have gone otherwise  
325 undetected in this study as well.

326           Stronger NFD among rare taxa is also important for coexistence in plant and animal  
327 communities, but the magnitude of this effect varies across taxonomic groups (Yenni *et al.* 2017;  
328 Rovere & Fox 2019). For example, NFD is less asymmetric for herpetofauna than plant or  
329 mammal communities (Yenni *et al.* 2017), possibly due to higher evenness (Rovere & Fox  
330 2019). Compared to macro-organismal systems, the degree of NFD asymmetry in our highly  
331 uneven bacterial community was moderate (SES = -4.03, covariance ratio = 1.08), suggesting  
332 that coexistence among rare taxa may be weak, or that additional factors not captured by this  
333 metric are important for maintaining diversity in our study system. However, we provide critical  
334 evidence that active bacteria mediate the biotic interactions responsible for generating stronger  
335 NFD among rare taxa in the community. Consistent with prior work showing that rare taxa may  
336 be disproportionately active in freshwater bacterial communities (Jones & Lennon 2010), our

337 study demonstrates that rare, metabolically active bacteria may also be critical for the long-term  
338 maintenance of bacterial diversity.

339

340 *Dynamic microbial seed banks:* Seed bank dynamics are thought to maintain diversity in  
341 fluctuating environments. In particular, seed banks provide a demographic buffering effect that  
342 satisfies one criterion of the storage effect. Evidence for coexistence via the storage effect comes  
343 largely from communities of desert annuals (Pake & Venable 1996; Angert *et al.* 2009),  
344 grasslands (Adler *et al.* 2006), tropical trees (Usinowicz *et al.* 2012), zooplankton (Cáceres  
345 1997), and marine fish (Secor 2007). In most bacterial studies, the role of seed banks for  
346 coexistence has been inferred from short-term observations, but here we provide temporal  
347 evidence that bacterial seed banks may be important for community dynamics and the  
348 maintenance of diversity over longer, multi-annual time scales. In the temperate climate of our  
349 study lake, different taxa showed maximum growth rates at different times of the year,  
350 coinciding with seasonal transitions in environmental conditions (Fig. 2), and contrasting active  
351 and total community dynamics suggested buffered population dynamics (Figs. 3-5). Bacterial  
352 taxa may also exhibit more fine-grained differences in temporal niches than can be characterized  
353 by peak activity, which may be a somewhat conservative estimate of temporal niche differences.  
354 Nevertheless, our data provide evidence that two out of the three criteria for a storage effect  
355 (differential responses to the environment and buffered population dynamics) may be operating  
356 in the community.

357 The third criterion of the storage effect is that there is covariance between environmental  
358 conditions and competition. Documenting this pattern, especially in highly diverse communities,  
359 can often be a challenge. Our study demonstrated that species experienced greater self-limitation



360 (consistent with stronger intraspecific than interspecific competition) when they were more  
361 common in the active community (and were thus more likely favored by the environment) (Fig.  
362 3, Fig. S2), and diversity was maintained during potentially unfavorable growth environments  
363 (Fig. 4), but it is unclear whether environmental fluctuations in this system generate the  
364 covariance between environment and competition necessary for a storage effect (Chesson 2000;  
365 Miller & Klausmeier 2017). Theoretical models indicate that the storage effect may be more  
366 likely to evolve when species' generation times are much shorter than the timescale of  
367 environmental fluctuations (Miller & Klausmeier 2017), a scenario that is well aligned with  
368 bacterioplankton living in a highly seasonal north temperate lake. In addition, we cannot rule out  
369 the potentially strong contribution to NFD by another non-mutually exclusive class of  
370 fluctuation-dependent mechanisms. Namely, relative nonlinearity in competition can promote  
371 coexistence if species differ in their responses to competition in ways that benefit their  
372 competitors (Yuan & Chesson 2015; Letten *et al.* 2018; Hallett *et al.* 2019). While our data  
373 cannot provide definitive proof, the documented patterns are consistent with the criteria needed  
374 for a storage effect to contribute to the long-term maintenance of bacterial diversity.

375 *Seasonal reoccurrence in bacterial communities:* Seed banks may also have more general  
376 implications for bacterial community dynamics. The persistence of taxa with temporal niche  
377 differences could contribute to the repeatability of summer community dynamics in the active  
378 portion of the community (Hellweger *et al.* 2008) by favoring overwinter survival (Fig. 4). For  
379 example, we found that the seed bank exhibited seasonality, such that diversity stored in the seed  
380 bank was maximized when environmental conditions (e.g., water temperature,  
381 resource/consumer densities) were least favorable for bacterial growth (Neuenschwander *et al.*  
382 2015). This pattern is consistent with the notion that dormant seed banks help buffer individuals

383 from harsh conditions. In addition, transitions from inactive to active metabolic states were more  
384 frequently detected among taxa that were, on average, rare when active in the community.  
385 Analogous to the methodological challenges of finding and identifying dormant individuals in  
386 non-microbial seed banks (e.g., plants), detection limits may affect the classification of  
387 metabolically active bacteria. Nevertheless, our reactivation metric should capture rapid shifts in  
388 the metabolically active portion of the community. Indeed, when compared to null models, our  
389 observations indicate that bacteria of rare-to-intermediate abundance ranks exhibited more  
390 frequent reactivations than would be expected by chance alone (Fig. S3), providing further  
391 evidence that seed banks are likely important sources of recolonization for bacterial communities  
392 inhabiting seasonal freshwater environments. Overall, these patterns suggest that recurrent  
393 environmental cues regulate active community dynamics by favoring different taxa at different  
394 times of the year, and that seed banks are important for maintaining these seasonal community  
395 trajectories at multi-annual timescales.

396 *Future directions and conclusions:* Our study provides empirical evidence consistent  
397 with the theory that niche differences and seed bank dynamics stabilize bacterial communities  
398 and maintain diversity in nature. In the naturally fluctuating lake environment of our study, we  
399 demonstrated key differences in the diversity, dynamics, and stabilization between the active and  
400 total subsets of the bacterial community, but an ultimate goal is to tighten the mechanistic links  
401 between rates of ribosomal RNA transcription and *in situ* growth rates for individual taxa  
402 (Newton & Shade 2016; Papp *et al.* 2018) or through other techniques that involve the physical  
403 sorting of cells based on metabolic activity prior to sequencing (Couradeau *et al.* 2019; Reichart  
404 *et al.* 2020). While our results showed that stabilizing mechanisms generated NFD in the  
405 community, an important next step is to quantify the strengths and directions of the multiple

406 fluctuation-independent and -dependent coexistence mechanisms that may be operating in  
407 diverse microbial communities (Letten *et al.* 2018; Ellner *et al.* 2019; Hallett *et al.* 2019).

408         A grand challenge at the intersection of microbial and community ecology is to extend  
409 the experimental investigations of microbial coexistence in the lab (Zhang *et al.* 2010; Letten *et*  
410 *al.* 2018) into systems reflecting the high diversity and complex interaction networks of most  
411 natural microbial communities. It will require careful experimentation as well as a clear  
412 consideration of the spatial scale of the study (e.g., to account for sampling biases and  
413 immigration that deviate from clear alignment with coexistence theory). For example, it may also  
414 be important to consider the dispersal of terrestrial bacteria into aquatic ecosystems (Crump *et al.*  
415 2012), since immigration could contribute to inferences made about local processes. However,  
416 previous work in our study system revealed that most terrestrial bacteria were metabolically  
417 inactive, most likely reflecting the abrupt environmental transitions that accompany cross-  
418 ecosystem dispersal (Wisnoski *et al.* 2020). Thus, the lack of asymmetric NFD we observed in  
419 the total community could also arise in part from allochthonous inputs of inactive bacteria that  
420 decouple local population growth of each OTU from its relative abundance in the community.  
421 However, by focusing on the dynamics of metabolically active bacteria, our approach was able to  
422 uncover the presence of stabilizing biotic interactions that may have otherwise been obscured by  
423 metabolic heterogeneity in the total community.

424         In conclusion, we show that stabilizing biotic interactions and the ability to engage in  
425 dormancy or slow growth strategies play important roles in maintaining microbial diversity in a  
426 natural ecosystem over a multi-year time scale. Our results demonstrate the mechanisms at the  
427 community scale that preserve Earth's vast microbial diversity, building on other explanations  
428 that emphasize the importance of metabolic diversity (Sala *et al.* 2008), capacity for rapid growth

429 (Shade *et al.* 2014), and spatial scale (Vos *et al.* 2013). In particular, strong NFD offers a new  
430 explanation for why the majority of bacterial taxa persist at low average relative abundances in  
431 nature (Lynch & Neufeld 2015). Furthermore, our work builds on inferences about the roles of  
432 microbial dormancy (and other persistence strategies) obtained from shorter time scales, and  
433 provides temporal evidence that dormancy is an important buffer against local extinction over  
434 longer time scales. More generally, our work demonstrates the importance of stabilization in  
435 microbial systems, offering new insight into the long-term maintenance of microbial diversity.

436

437

## ACKNOWLEDGEMENTS

438 We acknowledge technical support from Brent Lehmkuhl and Drew Meyer. This work  
439 was supported by the National Science Foundation (DEB-1442246 and 1934554 to JTL), US  
440 Army Research Office Grant (W911NF-14-1-0411 to JTL), National Aeronautics and Space  
441 Administration (80NSSC20K0618 to JTL), and the Department of Biology at Indiana University  
442 (Louise Constable Hoover Fellowship to NIW). Data and code for the project can be found at  
443 NCBI (BioProject PRJNA664410) and a Zenodo archive of the GitHub repository  
444 (<https://github.com/LennonLab/ul-seedbank>).

445

446

## REFERENCES

- 447 Adler, P.B., HilleRisLambers, J., Kyriakidis, P.C., Guan, Q. & Levine, J.M. (2006). Climate  
448 variability has a stabilizing effect on the coexistence of prairie grasses. *Proc. Natl. Acad.  
449 Sci.*, 103, 12793–12798.
- 450 Adler, P.B., HilleRisLambers, J. & Levine, J.M. (2007). A niche for neutrality. *Ecol. Lett.*, 10,  
451 95–104.
- 452 Alonso-Sáez, L., Díaz-Pérez, L. & Morán, X.A.G. (2015). The hidden seasonality of the rare  
453 biosphere in coastal marine bacterioplankton. *Environ. Microbiol.*, 17, 3766–3780.

- 454 Angert, A.L., Huxman, T.E., Chesson, P. & Venable, D.L. (2009). Functional tradeoffs  
455 determine species coexistence via the storage effect. *Proc. Natl. Acad. Sci.*, 106, 11641–  
456 11645.
- 457 Bautista, M.A., Zhang, C. & Whitaker, R.J. (2015). Virus-induced dormancy in the Archaeon  
458 *Sulfolobus islandicus*. *mBio*, 6, e02565-14.
- 459 Cáceres, C.E. (1997). Temporal variation, dormancy, and coexistence: a field test of the storage  
460 effect. *Proc. Natl. Acad. Sci.*, 94, 9171–9175.
- 461 Cadier, M., Andersen, K.H., Visser, A.W. & Kiørboe, T. (2019). Competition–defense tradeoff  
462 increases the diversity of microbial plankton communities and dampens trophic cascades.  
463 *Oikos*, 128, 1027–1040.
- 464 Caporaso, J.G., Lauber, C.L., Walters, W.A., Berg-Lyons, D., Huntley, J., Fierer, N., *et al.*  
465 (2012). Ultra-high-throughput microbial community analysis on the Illumina HiSeq and  
466 MiSeq platforms. *ISME J.*, 6, 1621–1624.
- 467 Chase, J.M. & Leibold, M.A. (2003). *Ecological niches: linking classical and contemporary*  
468 *approaches*. The University of Chicago Press, Chicago, IL.
- 469 Chesson, P. (1994). Multispecies competition in variable environments. *Theor. Popul. Biol.*, 45,  
470 227–276.
- 471 Chesson, P. (2000). Mechanisms of maintenance of species diversity. *Annu. Rev. Ecol. Syst.*, 31,  
472 343–366.
- 473 Chesson, P. & Huntly, N. (1997). The roles of harsh and fluctuating conditions in the dynamics  
474 of ecological communities. *Am. Nat.*, 150, 519–553.
- 475 Cole, J.R., Wang, Q., Cardenas, E., Fish, J., Chai, B., Farris, R.J., *et al.* (2009). The Ribosomal  
476 Database Project: Improved alignments and new tools for rRNA analysis. *Nucleic Acids*  
477 *Res.*, 37, 141–145.
- 478 Couradeau, E., Sasse, J., Goudeau, D., Nath, N., Hazen, T.C., Bowen, B.P., *et al.* (2019).  
479 Probing the active fraction of soil microbiomes using BONCAT-FACS. *Nat. Commun.*,  
480 10, 2770.
- 481 Crump, B.C., Amaral-Zettler, L.A. & Kling, G.W. (2012). Microbial diversity in arctic  
482 freshwaters is structured by inoculation of microbes from soils. *ISME J.*, 6, 1629–1639.
- 483 Crumpton, W.G., Isenhardt, T.M. & Mitchell, P.D. (1992). Nitrate and organic N analyses with  
484 second-derivative spectroscopy. *Limnol. Oceanogr.*, 37, 907–913.
- 485 Descamps-Julien, B. & Gonzalez, A. (2005). Stable coexistence in a fluctuating environment: an  
486 experimental demonstration. *Ecology*, 86, 2815–2824.
- 487 Ellner, S.P., Snyder, R.E., Adler, P.B. & Hooker, G. (2019). An expanded modern coexistence  
488 theory for empirical applications. *Ecol. Lett.*, 22, 3–18.
- 489 Evans, S.E., Wallenstein, M.D. & Burke, I.C. (2014). Is bacterial moisture niche a good  
490 predictor of shifts in community composition under long-term drought. *Ecology*, 95, 110–  
491 122.
- 492 Fuhrman, J.A., Cram, J.A. & Needham, D.M. (2015). Marine microbial community dynamics  
493 and their ecological interpretation. *Nat. Rev. Microbiol.*, 13, 133–146.
- 494 Gilbert, J.A., Steele, J.A., Caporaso, J.G., Steinbrück, L., Reeder, J., Temperton, B., *et al.*  
495 (2012). Defining seasonal marine microbial community dynamics. *ISME J.*, 6, 298–308.
- 496 Gray, D.A., Dugar, G., Gamba, P., Strahl, H., Jonker, M.J. & Hamoen, L.W. (2019). Extreme  
497 slow growth as alternative strategy to survive deep starvation in bacteria. *Nat. Commun.*,  
498 10, 890.

- 499 Gudelj, I., Weitz, J.S., Ferenci, T., Claire Horner-Devine, M., Marx, C.J., Meyer, J.R., *et al.*  
500 (2010). An integrative approach to understanding microbial diversity: from intracellular  
501 mechanisms to community structure. *Ecol. Lett.*, 13, 1073–1084.
- 502 Hallett, L.M., Shoemaker, L.G., White, C.T. & Suding, K.N. (2019). Rainfall variability  
503 maintains grass-forb species coexistence. *Ecol. Lett.*, 22, 1658–1667.
- 504 Harpole, W.S. & Suding, K.N. (2007). Frequency-dependence stabilizes competitive interactions  
505 among four annual plants. *Ecol. Lett.*, 10, 1164–1169.
- 506 Hellweger, F.L., Kravchuk, E.S., Novotny, V. & Gladyshev, M.I. (2008). Agent-based modeling  
507 of the complex life cycle of a cyanobacterium (*Anabaena*) in a shallow reservoir. *Limnol.*  
508 *Oceanogr.*, 53, 1227–1241.
- 509 Hoehler, T.M. & Jørgensen, B.B. (2013). Microbial life under extreme energy limitation. *Nat.*  
510 *Rev. Microbiol.*, 11, 83–94.
- 511 Holt, R.D. (2009). Bringing the Hutchinsonian niche into the 21st century: ecological and  
512 evolutionary perspectives. *Proc. Natl. Acad. Sci.*, 106, 19659–19665.
- 513 Johnson, D.R., Goldschmidt, F., Lilja, E.E. & Ackermann, M. (2012). Metabolic specialization  
514 and the assembly of microbial communities. *ISME J.*, 6, 1985–1991.
- 515 Jones, S.E. & Lennon, J.T. (2010). Dormancy contributes to the maintenance of microbial  
516 diversity. *Proc. Natl. Acad. Sci.*, 107, 5881–5886.
- 517 Kearney, S.M., Gibbons, S.M., Poyet, M., Gurry, T., Bullock, K., Allegretti, J.R., *et al.* (2018).  
518 Endospores and other lysis-resistant bacteria comprise a widely shared core community  
519 within the human microbiota. *ISME J.*, 12, 2403–2416.
- 520 Klobutcher, L.A., Ragkousi, K. & Setlow, P. (2006). The *Bacillus subtilis* spore coat provides  
521 “eat resistance” during phagocytic predation by the protozoan *Tetrahymena thermophila*.  
522 *Proc. Natl. Acad. Sci.*, 103, 165–170.
- 523 Lande, R. (1993). Risks of population extinction from demographic and environmental  
524 stochasticity and random catastrophes. *Am. Nat.*, 142, 911–927.
- 525 Leibold, M.A. (1996). A graphical model of keystone predators in food webs: trophic regulation  
526 of abundance, incidence, and diversity patterns in communities. *Am. Nat.*, 147, 784–784.
- 527 Lennon, J.T., Aanderud, Z.T., Lehmkuhl, B.K. & Schoolmaster, D.R. (2012). Mapping the niche  
528 space of soil microorganisms using taxonomy and traits. *Ecology*, 93, 1867–1879.
- 529 Lennon, J.T. & Jones, S.E. (2011). Microbial seed banks: the ecological and evolutionary  
530 implications of dormancy. *Nat. Rev. Microbiol.*, 9, 119–130.
- 531 Letten, A.D., Dhami, M.K., Ke, P.-J. & Fukami, T. (2018). Species coexistence through  
532 simultaneous fluctuation-dependent mechanisms. *Proc. Natl. Acad. Sci.*, 115, 6745–6750.
- 533 Lever, M.A., Rogers, K.L., Lloyd, K.G., Overmann, J., Schink, B., Thauer, R.K., *et al.* (2015).  
534 Life under extreme energy limitation: a synthesis of laboratory- and field-based  
535 investigations. *FEMS Microbiol. Rev.*, 39, 688–728.
- 536 Lindh, M.V., Sjöstedt, J., Andersson, A.F., Baltar, F., Hugerth, L.W., Lundin, D., *et al.* (2015).  
537 Disentangling seasonal bacterioplankton population dynamics by high-frequency  
538 sampling. *Environ. Microbiol.*, 17, 2459–2476.
- 539 Linz, A.M., Crary, B.C., Shade, A., Owens, S., Gilbert, J.A., Knight, R., *et al.* (2017). Bacterial  
540 community composition and dynamics spanning five years in freshwater bog lakes.  
541 *mSphere*, 2.
- 542 Locey, K.J., Muscarella, M.E., Larsen, M.L., Bray, S.R., Jones, S.E. & Lennon, J.T. (2020).  
543 Dormancy dampens the microbial distance–decay relationship. *Philos. Trans. R. Soc. B*  
544 *Biol. Sci.*, 375, 20190243.



- 545 Lynch, M.D.J. & Neufeld, J.D. (2015). Ecology and exploration of the rare biosphere. *Nat. Rev.*  
546 *Microbiol.*, 13, 217–229.
- 547 Meier, D.V., Pjevac, P., Bach, W., Hourdez, S., Girguis, P.R., Vidoudez, C., *et al.* (2017). Niche  
548 partitioning of diverse sulfur-oxidizing bacteria at hydrothermal vents. *ISME J.*, 11,  
549 1545–1558.
- 550 Mestre, M. & Höfer, J. (2020). The microbial conveyor belt: connecting the globe through  
551 dispersion and dormancy. *Trends Microbiol.*
- 552 Miller, E.T. & Klausmeier, C.A. (2017). Evolutionary stability of coexistence due to the storage  
553 effect in a two-season model. *Theor. Ecol.*, 10, 91–103.
- 554 Molin, S. & Givskov, M. (1999). Application of molecular tools for in situ monitoring of  
555 bacterial growth activity. *Environ. Microbiol.*, 1, 383–391.
- 556 Neuenschwander, S.M., Pernthaler, J., Posch, T. & Salcher, M.M. (2015). Seasonal growth  
557 potential of rare lake water bacteria suggest their disproportional contribution to carbon  
558 fluxes. *Environ. Microbiol.*, 17, 781–795.
- 559 Newton, R.J. & Shade, A. (2016). Lifestyles of rarity: understanding heterotrophic strategies to  
560 inform the ecology of the microbial rare biosphere. *Aquat. Microb. Ecol.*, 78, 51–63.
- 561 Nyirabuhoro, P., Liu, M., Xiao, P., Liu, L., Yu, Z., Wang, L., *et al.* (2020). Seasonal variability  
562 of conditionally rare taxa in the water column bacterioplankton community of subtropical  
563 reservoirs in China. *Microb. Ecol.*, 80, 14–26.
- 564 Pake, C.E. & Venable, D.L. (1996). Seed banks in desert annuals: implications for persistence  
565 and coexistence in variable environments. *Ecology*, 77, 1427–1435.
- 566 Papp, K., Hungate, B.A. & Schwartz, E. (2018). Microbial rRNA synthesis and growth  
567 compared through quantitative stable isotope probing with H<sub>2</sub><sup>18</sup>O. *Appl. Environ.*  
568 *Microbiol.*, 84, e02441-17.
- 569 Pernthaler, J. (2005). Predation on prokaryotes in the water column and its ecological  
570 implications. *Nat. Rev. Microbiol.*, 3, 537–546.
- 571 Quast, C., Pruesse, E., Yilmaz, P., Gerken, J., Schweer, T., Yarza, P., *et al.* (2013). The SILVA  
572 ribosomal RNA gene database project: improved data processing and web-based tools.  
573 *Nucleic Acids Res.*, 41, 590–596.
- 574 R Core Team. (2020). *R: A language and environment for statistical computing*. R Foundation  
575 for Statistical Computing, Vienna, Austria. URL <https://www.R-project.org/>.
- 576 Reichart, N.J., Jay, Z.J., Krukenberg, V., Parker, A.E., Spietz, R.L. & Hatzenpichler, R. (2020).  
577 Activity-based cell sorting reveals responses of uncultured archaea and bacteria to  
578 substrate amendment. *ISME J.*, 1–11.
- 579 de Rezende, J.R., Kjeldsen, K.U., Hubert, C.R.J., Finster, K., Loy, A. & Jørgensen, B.B. (2013).  
580 Dispersal of thermophilic Desulfotomaculum endospores into Baltic Sea sediments over  
581 thousands of years. *ISME J.*, 7, 72–84.
- 582 Rittershaus, E.S.C., Baek, S.-H. & Sasseti, C.M. (2013). The normalcy of dormancy: common  
583 themes in microbial quiescence. *Cell Host Microbe*, 13, 643–651.
- 584 Rognes, T., Flouri, T., Nichols, B., Quince, C. & Mahé, F. (2016). VSEARCH: a versatile open  
585 source tool for metagenomics. *PeerJ*, 4, e2584–e2584.
- 586 Rovere, J. & Fox, J.W. (2019). Persistently rare species experience stronger negative frequency  
587 dependence than common species: A statistical attractor that is hard to avoid. *Glob. Ecol.*  
588 *Biogeogr.*, 28, 508–520.

- 589 Sala, M.M., Terrado, R., Lovejoy, C., Unrein, F. & Pedrós-Alió, C. (2008). Metabolic diversity  
590 of heterotrophic bacterioplankton over winter and spring in the coastal Arctic Ocean.  
591 *Environ. Microbiol.*, 10, 942–949.
- 592 Schloss, P.D., Westcott, S.L., Ryabin, T., Hall, J.R., Hartmann, M., Hollister, E.B., *et al.* (2009).  
593 Introducing mothur: open-source, platform-independent, community-supported software  
594 for describing and comparing microbial communities. *Appl. Environ. Microbiol.*, 75,  
595 7537–7541.
- 596 Secor, D.H. (2007). The year-class phenomenon and the storage effect in marine fishes. *J. Sea*  
597 *Res.*, Proceedings of the Sixth International Symposium on Flatfish Ecology, Part I, 57,  
598 91–103.
- 599 Setlow, P. (2006). Spores of *Bacillus subtilis*: their resistance to and killing by radiation, heat  
600 and chemicals. *J. Appl. Microbiol.*, 101, 514–525.
- 601 Shade, A., Dunn, R.R., Blowes, S.A., Keil, P., Bohannan, B.J.M., Herrmann, M., *et al.* (2018).  
602 Macroecology to unite all life, large and small. *Trends Ecol. Evol.*, 33, 731–744.
- 603 Shade, A., Jones, S.E., Gregory Caporaso, J., Handelsman, J., Knight, R., Fierer, N., *et al.*  
604 (2014). Conditionally rare taxa disproportionately contribute to temporal changes in  
605 microbial diversity. *mBio*, 5, 1–9.
- 606 Shade, A., Kent, A.D., Jones, S.E., Newton, R.J., Triplett, E.W. & McMahon, K.D. (2007).  
607 Interannual dynamics and phenology of bacterial communities in a eutrophic lake.  
608 *Limnol. Oceanogr.*, 52, 487–494.
- 609 Sogin, M.L., Morrison, H.G., Huber, J.A., Welch, D.M., Huse, S.M., Neal, P.R., *et al.* (2006).  
610 Microbial diversity in the deep sea and the underexplored “rare biosphere.” *Proc. Natl.*  
611 *Acad. Sci.*, 103, 12115–12120.
- 612 Sorensen, J.W. & Shade, A. (2020). Dormancy dynamics and dispersal contribute to soil  
613 microbiome resilience. *Philos. Trans. R. Soc. B Biol. Sci.*, 375, 20190255.
- 614 Steiner, P.A., Corte, D.D., Geijo, J., Mena, C., Yokokawa, T., Rattei, T., *et al.* (2019). Highly  
615 variable mRNA half-life time within marine bacterial taxa and functional genes. *Environ.*  
616 *Microbiol.*
- 617 Thingstad, T.F., Våge, S., Storesund, J.E., Sandaa, R.-A. & Giske, J. (2014). A theoretical  
618 analysis of how strain-specific viruses can control microbial species diversity. *Proc. Natl.*  
619 *Acad. Sci.*, 111, 7813–7818.
- 620 Tilman, D. (1982). *Resource competition and community structure*. Princeton University Press,  
621 Princeton, NJ.
- 622 Usinowicz, J., Wright, S.J. & Ives, A.R. (2012). Coexistence in tropical forests through  
623 asynchronous variation in annual seed production. *Ecology*, 93, 2073–2084.
- 624 Vos, M., Wolf, A.B., Jennings, S.J. & Kowalchuk, G.A. (2013). Micro-scale determinants of  
625 bacterial diversity in soil. *FEMS Microbiol. Rev.*, 37, 936–954.
- 626 Ward, C.S., Yung, C.-M., Davis, K.M., Blinebry, S.K., Williams, T.C., Johnson, Z.I., *et al.*  
627 (2017). Annual community patterns are driven by seasonal switching between closely  
628 related marine bacteria. *ISME J.*, 11, 1412–1422.
- 629 Warner, R.R. & Chesson, P.L. (1985). Coexistence mediated by recruitment fluctuations: a field  
630 guide to the storage effect. *Am. Nat.*, 125, 769–787.
- 631 Westcott, S.L. & Schloss, P.D. (2017). OptiClust, an improved method for assigning amplicon-  
632 based sequence data to operational taxonomic units. *mSphere*, 2, e00073-17.
- 633 Wetzel, R.G. & Likens, G.E. (2000). *Limnological analyses*. 3rd ed. Springer, New York, NY.



- 634 Wisnoski, N.I., Muscarella, M.E., Larsen, M.L., Peralta, A.L. & Lennon, J.T. (2020). Metabolic  
635 insight into bacterial community assembly across ecosystem boundaries. *Ecology*, 101,  
636 e02968.
- 637 Wörmer, L., Hoshino, T., Bowles, M.W., Viehweger, B., Adhikari, R.R., Xiao, N., *et al.* (2019).  
638 Microbial dormancy in the marine subsurface: global endospore abundance and response  
639 to burial. *Sci. Adv.*, 5, eaav1024.
- 640 Yenni, G., Adler, P.B. & Ernest, S.K.M. (2012). Strong self-limitation promotes the persistence  
641 of rare species. *Ecology*, 93, 456–461.
- 642 Yenni, G., Adler, P.B. & Ernest, S.K.M. (2017). Do persistent rare species experience stronger  
643 negative frequency dependence than common species? *Glob. Ecol. Biogeogr.*, 26, 513–  
644 523.
- 645 Yuan, C. & Chesson, P. (2015). The relative importance of relative nonlinearity and the storage  
646 effect in the lottery model. *Theor. Popul. Biol.*, 105, 39–52.
- 647 Zhang, Q.-G., Buckling, A. & Godfray, H.C.J. (2010). Quantifying the relative importance of  
648 niches and neutrality for coexistence in a model microbial system. *J. Ecol.*, 1139–1147.
- 649

650

## FIGURE LEGENDS

651 **Figure 1.** Seasonal dynamics of the active bacterial community in University Lake. (A) The  
652 compositional trajectory of the active community (determined by high-throughput sequencing of  
653 16S rRNA transcripts) shows strong seasonality, but the community remains relatively static  
654 over winter. The first two axes of the principal component analysis (PCA) depict summer/winter  
655 differences (PC1) along the major axis, and slight inter-annual differences in winter composition  
656 (cool colors) along the minor axis (PC2). The summer successional trajectory (warmer colors) is  
657 highly repeatable across years. (B) Constrained ordination using redundancy analysis (RDA)  
658 shows the environmental drivers of community structure, along with strong correlates of  
659 individual taxa in the community. This analysis reveals that differences in pH explain variation  
660 in winter composition among years.

661

662 **Figure 2.** Temporal partitioning of maximum growth rate among persistent bacterial taxa in  
663 University Lake. Lines represent the mean daily growth rate for each taxon over the time series.  
664 Points indicate the maximum growth observed for each bacterial taxon (OTU). Overall, the 82  
665 persistent OTUs have maximum growth rates at different seasons of the year. Points are color-  
666 coded such that warmer colors correspond to spring and summer months and cooler colors  
667 correspond to winter months. Colored lined trace out the growth dynamics of three individual  
668 taxa with different environmental responses (blue = OTU 1, Betaproteobacteria; yellow = OTU  
669 17, Actinobacteria; mauve = OTU 18, Gammaproteobacteria). More taxonomic details can be  
670 found in Table S1.

671

672 **Figure 3.** Negative frequency dependence (NFD) among persistent bacterial taxa ( $n = 82$ ) was  
673 significantly stronger for rare than common taxa only in the active portion of the community.  
674 The degree of asymmetry in NFD is determined by the covariance between the equilibrium  
675 frequency of each OTU and its strength of NFD; negative covariance indicates that rarer taxa  
676 exhibit stronger NFD. Compared with expected covariances from a null distribution, the  
677 standardized effect size (SES) of the observed covariance in the active portion of the community  
678 was  $-4.03$ , while the SES of the total community was  $-0.77$ . The overall strength of NFD  
679 (observed NFD / mean NFD) was  $1.08$  in the active portion and  $1.01$  in the total community. The  
680 metabolic state on the y-axis indicates whether the NFD comparison is for the active portion of  
681 the community (inferred from 16S rRNA transcripts) or the total portion (inferred from 16S  
682 rRNA genes, i.e., DNA).

683

684 **Figure 4.** Seasonal importance of the seed bank for bacterial diversity in University Lake.  
685 Richness was much higher in the total community, relative to the active community, during the  
686 fall and winter months. The active and total communities converged over the summer, indicated  
687 by values on the y-axis closer to 1. Warmer colors correspond to spring and summer months,  
688 while cooler colors correspond to winter months. Shaded regions correspond to the fall and  
689 winter months (October through March).

690

691 **Figure 5.** Rare taxa showed more seed bank transitions than common taxa. For the 82 persistent  
692 taxa identified over the time series, OTUs that were (on average) rare in the active portion of the  
693 community had a higher number of reactivations from the seed bank, while more common taxa  
694 had fewer reactivations. Regression lines are locally estimated scatterplot smoothing (LOESS).

695

## FIGURES

696 Figure 1

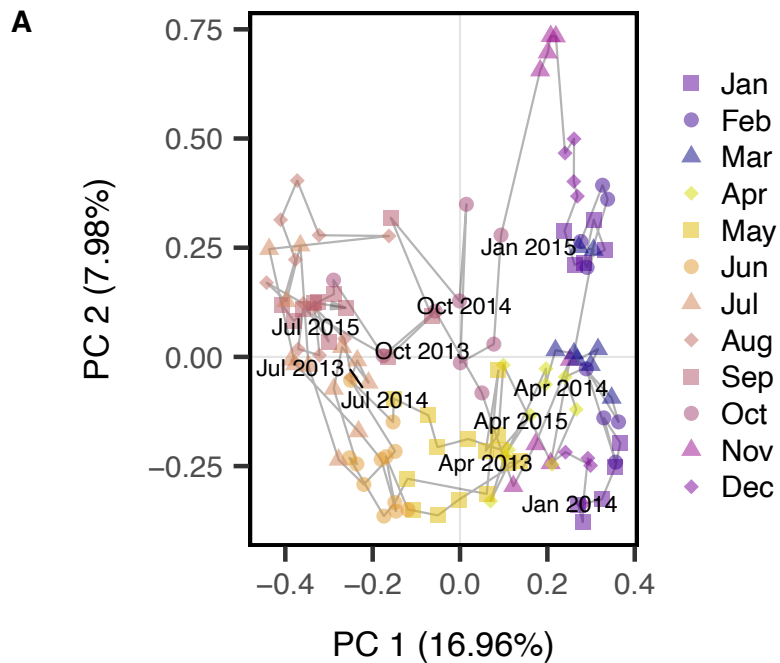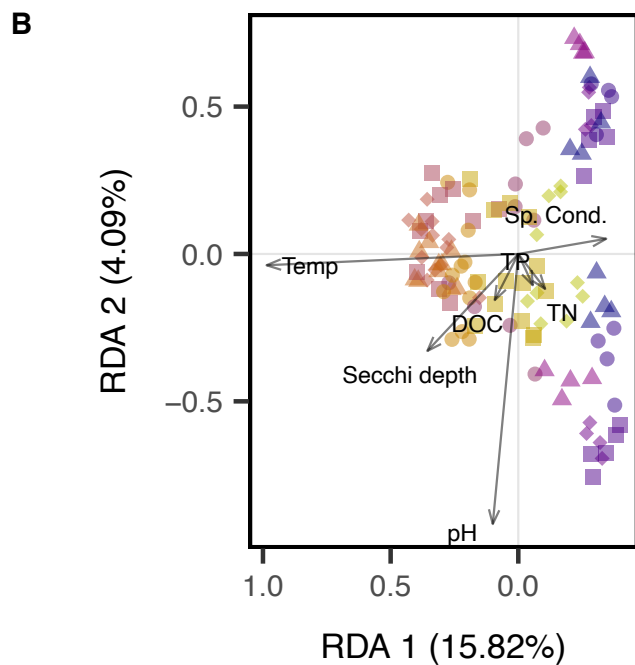

697

698

699

700 Figure 2.

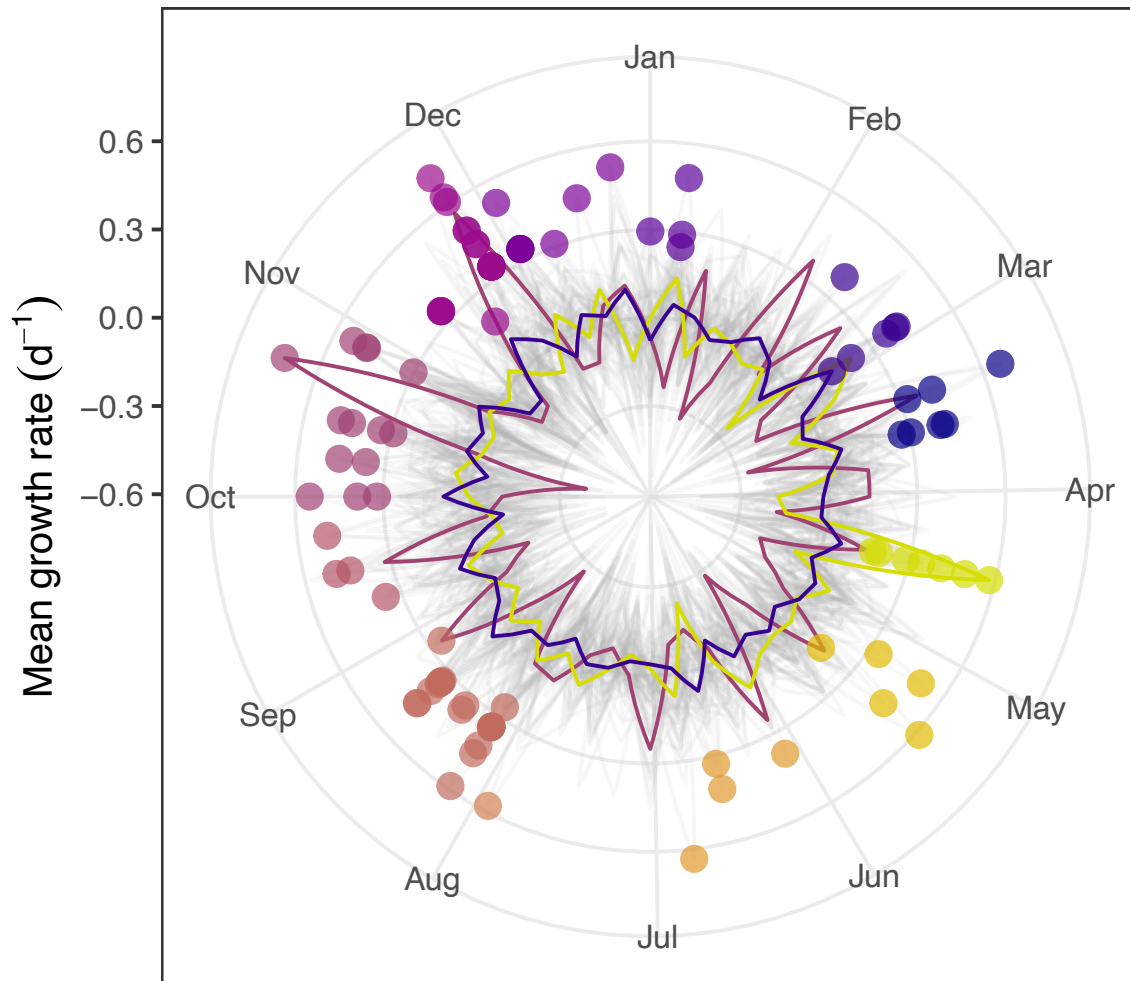

701

702

703

704 Figure 3.

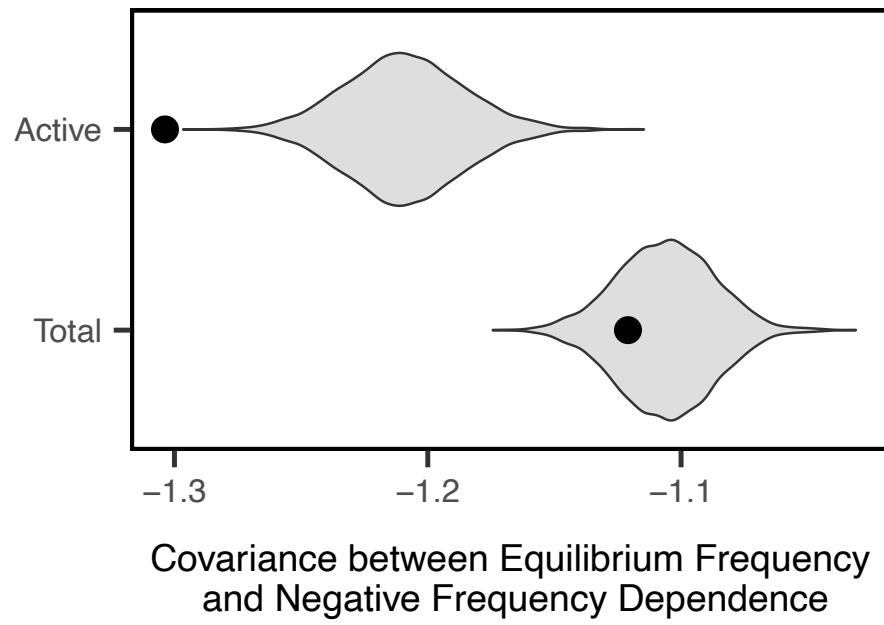

705

706

707

708 Figure 4.

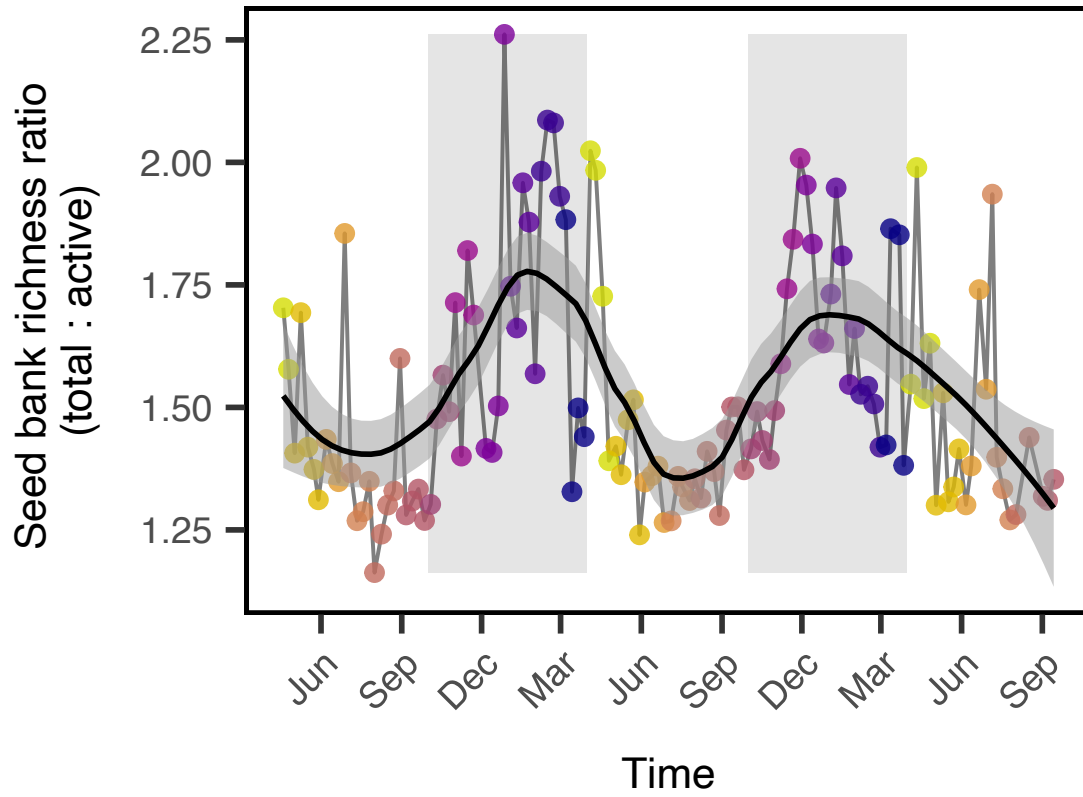

709

710

711

712 Figure 5.

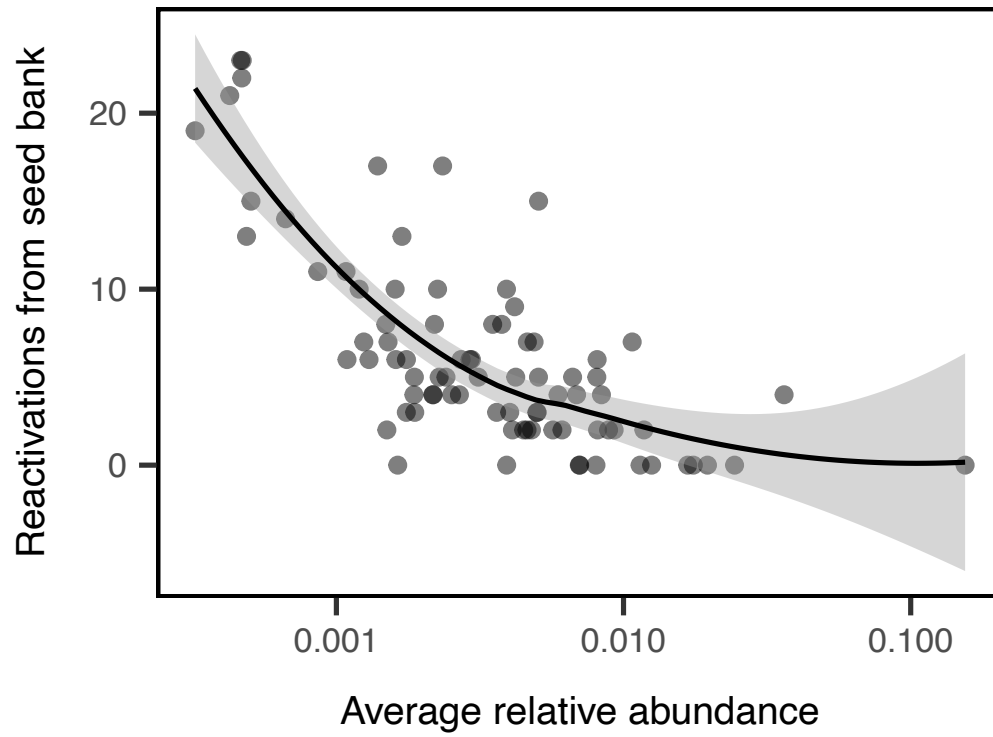

713

714



715

716

## SUPPLEMENTAL INFORMATION

717 **Table S1.** Operational taxonomic units (OTUs) that were classified as persistent in the

718 bacterioplankton community based on being detected in  $\geq 80\%$  of the total (i.e., DNA)

719 community samples. The table is sorted by Julian date of max growth.

| OTU      | Class               | Max growth rate ( $d^{-1}$ ) | Date of max growth |
|----------|---------------------|------------------------------|--------------------|
| Otu00034 | Alphaproteobacteria | 0.3426                       | 2014-01-17         |
| Otu00045 | Betaproteobacteria  | 0.8527                       | 2014-01-03         |
| Otu00196 | Actinobacteria      | 0.5873                       | 2015-01-09         |
| Otu00019 | Cytophagia          | 0.7346                       | 2014-02-14         |
| Otu00039 | Betaproteobacteria  | 0.7167                       | 2014-02-14         |
| Otu00102 | Betaproteobacteria  | 0.6729                       | 2015-02-28         |
| Otu00105 | Alphaproteobacteria | 0.8666                       | 2014-02-28         |
| Otu00065 | Sphingobacteriia    | 0.8563                       | 2014-03-21         |
| Otu00292 | Alphaproteobacteria | 0.6851                       | 2014-03-07         |
| Otu00006 | Sphingobacteriia    | 0.3643                       | 2013-04-25         |
| Otu00012 | Betaproteobacteria  | 0.8784                       | 2014-04-18         |
| Otu00014 | Actinobacteria      | 0.4906                       | 2015-04-26         |
| Otu00016 | Actinobacteria      | 0.7836                       | 2014-04-18         |
| Otu00017 | Actinobacteria      | 1.0200                       | 2015-04-04         |
| Otu00021 | Gammaproteobacteria | 1.0449                       | 2014-04-18         |
| Otu00033 | Alphaproteobacteria | 0.5306                       | 2014-04-25         |
| Otu00048 | Verrucomicrobiae    | 0.7426                       | 2015-04-11         |

|          |                     |        |            |
|----------|---------------------|--------|------------|
| Otu00049 | Actinobacteria      | 0.6090 | 2014-04-04 |
| Otu00055 | Flavobacteriia      | 0.7950 | 2014-04-18 |
| Otu00058 | Armatimonadia       | 0.8153 | 2015-04-11 |
| Otu00148 | Bacteria sp.        | 0.7646 | 2013-04-25 |
| Otu00172 | Gammaproteobacteria | 0.6729 | 2015-04-11 |
| Otu00219 | Betaproteobacteria  | 0.7503 | 2014-04-18 |
| Otu00002 | Actinobacteria      | 0.3190 | 2015-05-03 |
| Otu00008 | Actinobacteria      | 0.3637 | 2013-05-09 |
| Otu00022 | Opitutae            | 0.8003 | 2015-05-03 |
| Otu00031 | Cytophagia          | 0.6593 | 2014-05-09 |
| Otu00051 | Flavobacteriia      | 0.9187 | 2013-05-09 |
| Otu00062 | Flavobacteriia      | 0.7836 | 2015-05-23 |
| Otu00064 | Alphaproteobacteria | 0.6964 | 2013-05-29 |
| Otu00113 | Bacteroidetes sp.   | 0.7950 | 2013-05-09 |
| Otu00116 | Betaproteobacteria  | 0.8373 | 2014-05-09 |
| Otu00151 | Betaproteobacteria  | 0.7259 | 2013-05-17 |
| Otu00183 | Bacteria sp.        | 0.6090 | 2015-05-03 |
| Otu00200 | Bacteria sp.        | 0.6851 | 2015-05-23 |
| Otu00083 | Flavobacteriia      | 1.0031 | 2015-06-06 |
| Otu00087 | Betaproteobacteria  | 0.5873 | 2014-06-05 |
| Otu00098 | Betaproteobacteria  | 0.8104 | 2013-06-14 |
| Otu00123 | Sphingobacteriia    | 0.7259 | 2014-06-20 |
| Otu00194 | Deltaproteobacteria | 0.9277 | 2014-06-13 |

|          |                     |        |            |
|----------|---------------------|--------|------------|
| Otu00294 | Alphaproteobacteria | 0.6964 | 2013-06-21 |
| Otu00004 | Actinobacteria      | 0.3500 | 2015-07-11 |
| Otu00009 | Gammaproteobacteria | 1.3329 | 2013-07-26 |
| Otu00011 | Betaproteobacteria  | 0.9841 | 2015-07-18 |
| Otu00192 | Bacteria sp.        | 0.4350 | 2013-07-26 |
| Otu00195 | Actinobacteria      | 0.6277 | 2014-07-18 |
| Otu00020 | Betaproteobacteria  | 0.4150 | 2013-08-01 |
| Otu00026 | Betaproteobacteria  | 0.6277 | 2013-08-01 |
| Otu00029 | Actinobacteria      | 0.6593 | 2013-08-23 |
| Otu00036 | Alphaproteobacteria | 0.7576 | 2013-08-16 |
| Otu00037 | Actinobacteria      | 0.7646 | 2014-08-29 |
| Otu00052 | Alphaproteobacteria | 0.6444 | 2013-08-09 |
| Otu00076 | Actinobacteria      | 0.6444 | 2014-08-08 |
| Otu00112 | Alphaproteobacteria | 0.5873 | 2014-08-23 |
| Otu00226 | Opitutae            | 0.6729 | 2015-08-02 |
| Otu00250 | Actinobacteria      | 0.5306 | 2013-08-23 |
| Otu00010 | Proteobacteria sp.  | 0.6277 | 2014-09-26 |
| Otu00024 | Bacteroidetes sp.   | 0.7259 | 2014-09-19 |
| Otu00056 | Cytophagia          | 0.7711 | 2013-09-06 |
| Otu00067 | Betaproteobacteria  | 0.5306 | 2015-09-02 |
| Otu00177 | Proteobacteria sp.  | 0.5306 | 2013-09-20 |
| Otu00005 | Sphingobacteriia    | 0.5294 | 2014-10-04 |
| Otu00015 | Actinobacteria      | 0.6277 | 2014-10-17 |

|          |                     |        |            |
|----------|---------------------|--------|------------|
| Otu00018 | Gammaproteobacteria | 0.9516 | 2014-10-11 |
| Otu00060 | Betaproteobacteria  | 1.0031 | 2013-10-25 |
| Otu00066 | Betaproteobacteria  | 0.8153 | 2013-10-25 |
| Otu00082 | Bacteroidetes sp.   | 0.8003 | 2014-10-04 |
| Otu00154 | Alphaproteobacteria | 0.7070 | 2014-10-04 |
| Otu00158 | Gammaproteobacteria | 0.9141 | 2013-10-04 |
| Otu00001 | Betaproteobacteria  | 0.2860 | 2013-11-15 |
| Otu00007 | Betaproteobacteria  | 0.4577 | 2013-11-15 |
| Otu00038 | Actinobacteria      | 0.7346 | 2014-11-29 |
| Otu00047 | Betaproteobacteria  | 0.6729 | 2013-11-15 |
| Otu00073 | Betaproteobacteria  | 0.4906 | 2013-11-22 |
| Otu00077 | Flavobacteriia      | 0.7774 | 2013-11-15 |
| Otu00109 | Actinobacteria      | 0.6729 | 2013-11-15 |
| Otu00118 | Actinobacteria      | 0.6090 | 2013-11-22 |
| Otu00129 | Alphaproteobacteria | 0.4906 | 2013-11-15 |
| Otu00198 | Betaproteobacteria  | 0.9210 | 2013-11-15 |
| Otu00208 | Betaproteobacteria  | 0.6964 | 2013-11-22 |
| Otu00217 | Proteobacteria sp.  | 0.7167 | 2013-11-22 |

---

720

721

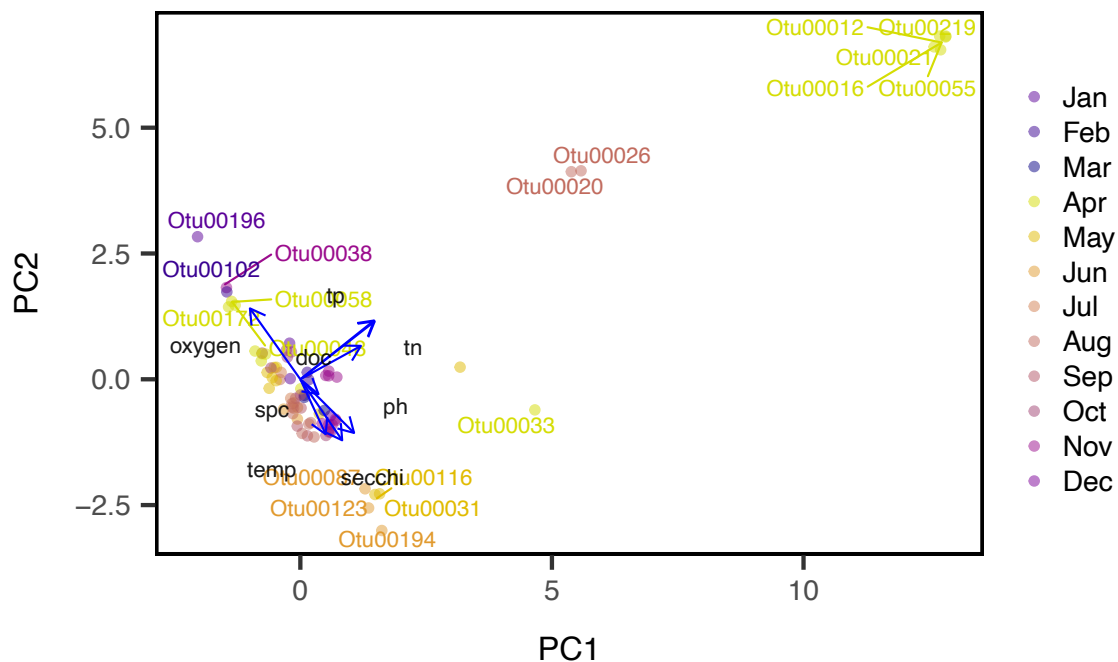

722

723 **Figure S1.** Temporal partitioning of maximum growth rates corresponds to environmental  
724 conditions. Here, we depict a principal component analysis of the environmental conditions at  
725 each date. OTU labels indicate the individual taxa that exhibit maximum growth at the  
726 corresponding time of the year. Vectors indicate the loadings of environmental variables along  
727 the two PC axes. Warmer colors correspond to spring and summer months, cooler colors  
728 correspond to winter months.

729

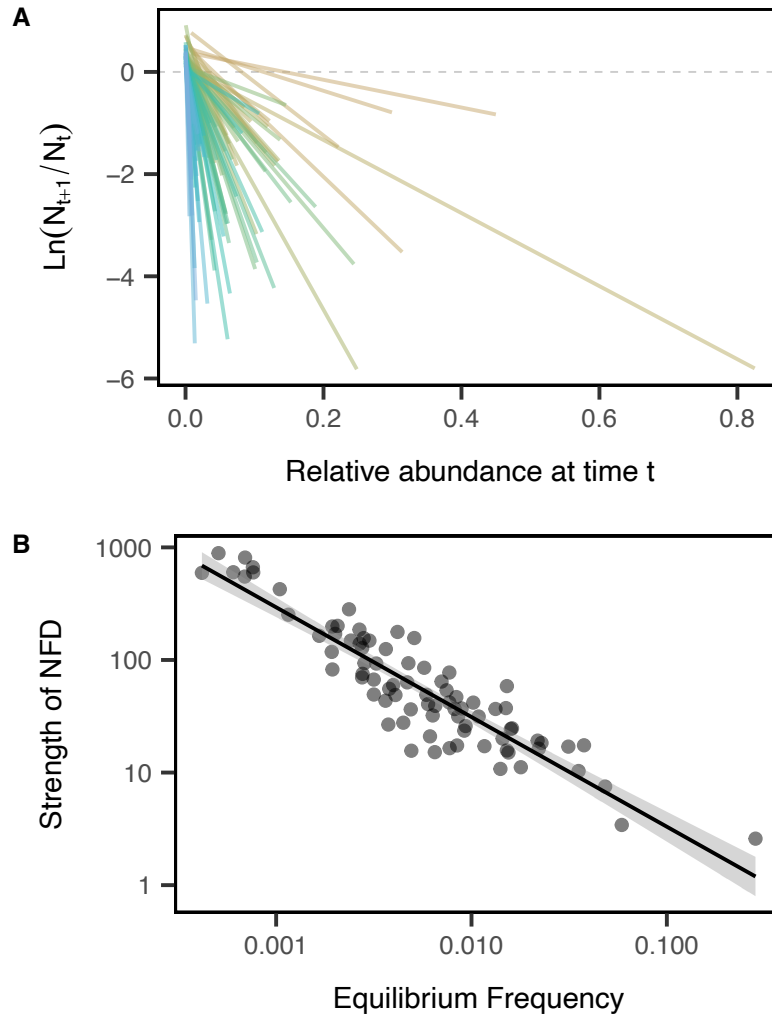

730

731 **Figure S2.** Negative frequency dependence (NFD) in the active portion of the community for the

732 82 persistent bacterial taxa. (A) Relationship between the rate of change of an OTU and its

733 relative abundance. Depicted in this graph are simple linear regression fits for the 82 taxa

734 individually, data points not shown to reduce clutter. Negative relationships indicate NFD

735 growth and variation in slopes indicates variation in the strength of NFD. (B) Rare taxa (lower

736 equilibrium frequencies) exhibit stronger NFD, while common taxa (higher equilibrium

737 frequency) have weaker NFD.

738

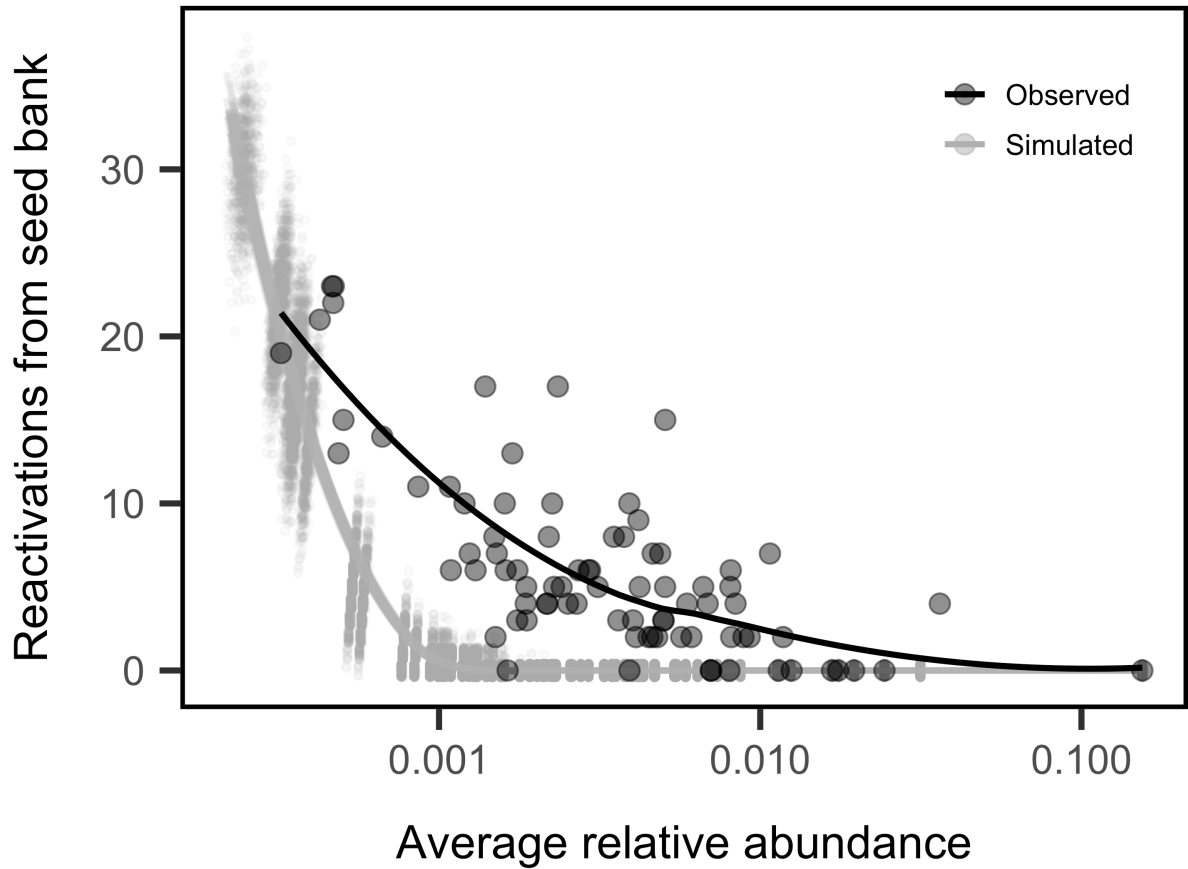

739

740 **Figure S3.** Observed reactivations from the seed bank are more frequent than expected by  
741 chance alone. Null model simulations ( $n = 1000$ ) describe the range of expectations expected by  
742 chance for the relationship between relative abundance and reactivation rate (gray points). For  
743 observed data (black points) and the null simulations, we fit local regression lines with locally  
744 estimated scatterplot smoothing (LOESS).
